# Supplementary material for: Effect of social media interventions on the education and communication among patients with cancer: a systematic review protocol
Source: PubMed Central journal article supplement — BMJ Open. 2022 Nov 30;12(11):e066550. doi: 10.1136/bmjopen-2022-066550 (PMC9716998; doi:10.1136/bmjopen-2022-066550), 2022-11-30
Supplement: bmjopen-2022-066550.draft_revisions.pdf [file bmjopen-2022-066550.draft_revisions.pdf]

# BMJ Open

BMJ Open is committed to open peer review. As part of this commitment we make the peer review history of every article we publish publicly available.

When an article is published we post the peer reviewers' comments and the authors' responses online. We also post the versions of the paper that were used during peer review. These are the versions that the peer review comments apply to.

The versions of the paper that follow are the versions that were submitted during the peer review process. They are not the versions of record or the final published versions. They should not be cited or distributed as the published version of this manuscript.

BMJ Open is an open access journal and the full, final, typeset and author-corrected version of record of the manuscript is available on our site with no access controls, subscription charges or pay-per-view fees (<http://bmjopen.bmj.com>).

If you have any questions on BMJ Open's open peer review process please email [info.bmjopen@bmj.com](mailto:info.bmjopen@bmj.com)

# BMJ Open

## The effect of social media interventions on the education and communication among patients with cancer: A study protocol of a systematic review

|                               |                                                                                                                                                                                                                                                                                                                                                                                                                                                                                                                                                                                                                                               |
|-------------------------------|-----------------------------------------------------------------------------------------------------------------------------------------------------------------------------------------------------------------------------------------------------------------------------------------------------------------------------------------------------------------------------------------------------------------------------------------------------------------------------------------------------------------------------------------------------------------------------------------------------------------------------------------------|
| Journal:                      | <i>BMJ Open</i>                                                                                                                                                                                                                                                                                                                                                                                                                                                                                                                                                                                                                               |
| Manuscript ID                 | bmjopen-2022-066550                                                                                                                                                                                                                                                                                                                                                                                                                                                                                                                                                                                                                           |
| Article Type:                 | Protocol                                                                                                                                                                                                                                                                                                                                                                                                                                                                                                                                                                                                                                      |
| Date Submitted by the Author: | 10-Jul-2022                                                                                                                                                                                                                                                                                                                                                                                                                                                                                                                                                                                                                                   |
| Complete List of Authors:     | Banaye Yazdipour, Alireza; Tehran University of Medical Sciences, Department of Health Information Management<br>Niakan Kalhori, Sharareh R. ; Tehran University of Medical Sciences, Health Information Management<br>Bostan, Hassan; Tehran University of Medical Sciences, Department of Health Information Management<br>Masourian, Hoorieh; Tehran University of Medical Sciences, Department of Health Information Management<br>Ataee, Elham; Tehran University of Medical Sciences, Department of Health Information Management<br>Sajjadi, Hasan; Tehran University of Medical Sciences, Department of Health Information Management |
| Keywords:                     | Health informatics < BIOTECHNOLOGY & BIOINFORMATICS, Information management < BIOTECHNOLOGY & BIOINFORMATICS, Information technology < BIOTECHNOLOGY & BIOINFORMATICS, EDUCATION & TRAINING (see Medical Education & Training)                                                                                                                                                                                                                                                                                                                                                                                                                |
|                               |                                                                                                                                                                                                                                                                                                                                                                                                                                                                                                                                                                                                                                               |

SCHOLARONE™  
Manuscripts

## The effect of social media interventions on the education and communication among patients with cancer: A study protocol of a systematic review

Alireza Banaye Yazdipour<sup>1,2</sup>, Sharareh R. Niakan Kalhori<sup>1</sup>, Hassan Boostan<sup>1</sup>, Hoorieh Masourian<sup>1</sup>, Elham Ataee<sup>1</sup>, Hassan Sajjadi<sup>1</sup>

1- Department of Health Information Management, School of Allied Medical Sciences, Tehran University of Medical Sciences, Tehran, Iran

2- Department of Medical Records and Health Information Technology, School of Paramedical Sciences, Mashhad University of Medical Sciences, Mashhad, Iran.

\*Corresponding author: Hassan Sajjadi, hasan.sajjadi1995@gmail.com

### Abstract

**Introduction** Cancer is a leading cause of death in the worldwide. In addition, accounting for approximately 10 million deaths in 2020 alone. Information and communication technologies (ICT) have great potential for improving health education and communication. One of the technologies that can help cancer patients and healthcare providers for communicating and providing educational information is social media. Social media are increasingly being used for health promotion and behavior change. This is a protocol of systematic review to identify the effect of social media interventions on the education and communication among patients affected by any type of cancer. The aim of this study is to reveal the steps of conducting research which review all studies for the specific objective systematically. Their studies objective is to examine the social media interventions on improving awareness and knowledge about the disease for patients with cancer and better communications among them.

**Methods and analysis** This protocol is reported in accordance with the Preferred Reporting Items for Systematic Review and Meta-Analysis Protocols (PRISMA-P) checklist. We will include any types of observational or experimental design studies that report on the effect of social media interventions on the education and communication among patients with any type of cancer or malignancy and any stage of disease. Interventions will be inclusive using of all social network platforms for patients' communication and education. We will search PubMed, Web of Science, Scopus, and the Cochrane Library from inception until 23 May 2022. Two independent reviewers will screen titles, abstracts and full-text articles with conflicts resolved through discussion or by a third reviewer, as needed. All titles, abstracts, and full-text articles will be reviewed independently by two reviewers according to the inclusion and exclusion criteria. Discrepancies will resolve by discussion or S.R.N.K if needed. The two reviewers will also independently complete risk of bias assessments for each included study. Based on the study's variables, the descriptive analysis including frequency and percentage parameters will be calculated. Furthermore, we will report the results of the quality assessment of studies in table format. In the result section, a narrative synthesis will be applied to describe and compare the paper's results.

**Ethics and dissemination** As this is a systematic review, ethical approval for conduct of this study is not required. We will pursue publication of study results in a relevant peer-reviewed journal and report our findings according to the PRISMA checklist.

**Trial registration number** CRD42022334691.

## Strengths and limitations of this study

- No previous systematic reviews to investigate the effect of social media intervention on the education and communication among patients affected by any type of cancer exist.
- This will be the most up-to-date and comprehensive systematic review as it relates to social media interventions on the education and communication among patients affected by any type of cancer.
- The review will undertake a rigorous selection process with screening of articles and risk of bias assessment for each study to be conducted by two independent reviewers and a third reviewer to resolve conflicts if necessary.
- The review will be limited to papers published in English language and may will be missed relevant studies published in other languages which could have influenced the overall findings.

## 1- Introduction

According to World Health Organization (WHO), cancer is a leading cause of death in the worldwide. In addition, accounting for approximately 10 million deaths in 2020 alone (1). The most common types of cancer include breast, lung, colorectal, prostate, skin (non-melanoma), and stomach (1, 2). Due to limited resources contribute to the cancer, it is important to raise awareness, knowledge, and understanding of patients about cancer (3-5).

It has been over a decade since the Institute of Medicine (IOM) first recommended that patients should have an active role in their health care (6). Information and communication technologies (ICT) have great potential for improving health education (7). Technology also has redefined the way patients and providers communicate and obtain health information (8). One of the technologies that can help cancer patients and healthcare providers for communicating and providing educational information is social media (9). The number of social media users has increased significantly in the past decade and social media have many opportunities and benefits for health care (10). Social media are widespread web-based or mobile-based platforms that allow individuals to connect with others within a virtual network that they can create, share or exchange various forms of digital content in various formats such as messages, information, photos, and videos (11). Social media tools and platforms such as Facebook and Twitter can provide an important role for public health promotion (12, 13). They help patients for communication with each other and healthcare professionals and sharing health information and experiences about diseases prevention, symptoms, and treatment (10, 12, 14). In addition, they provide emotional and social support for cancer patients and their healthcare providers (15). A collaborative and interactive relationship between patients together and patients with healthcare professionals is considered an important element for patient empowerment, and illness management (16). Social media, due to the ability of sharing the educational content, may improve knowledge or awareness of health topics or motivate cancer patients' behavior change (12). Social media can facilitate the process of education and communication with patients affected by cancer and health care providers. In addition, its leads to saving time and cost (17).

Although systematic reviews were conducted for education (18-21) and communication (22-26) with cancer patients, no systematic review is available to investigate the effect of social media intervention on these specific outcomes. This is the first protocol for a systematic review to identify the effect of social media interventions on the education and communication among patients affected by any type of cancer.

## 2- Methods and analysis

### 2-1- Study design and registration

This systematic review protocol was written and reported according to the Preferred Reporting Items for Systematic Review and Meta-Analysis Protocols (PRISMA-P) checklist (27). The protocol of this systematic review is registered in the PROSPERO database (CRD42022334691).

### 2-2 Eligibility criteria

#### 2-2-1- PICO framework

We will use the population, intervention, comparators, and outcomes (PICO) framework for the purpose of this systematic review to clearly define the different components of this review and to aid in study selection.

#### Population:

- Patients with any type of cancer or malignancy and any stage of disease.

#### Intervention:

- Using of all social network platforms for patients' communication and education.

#### Comparison:

- Patients receiving the same sort of intervention with social media and other ways of education and communication.
- Some studies will have no comparison or comparator intervention.

#### Outcome:

- Education-related outcomes, including awareness, and knowledge improvement.
- Communications related outcomes, such as communication with family members, healthcare providers, same cancer-affected patients, and other stakeholders.

#### 2-2-2- Further inclusion criteria:

1. Original research papers and proceeding papers;
2. Full text available;
3. Studies with observational or experimental design;
4. Studies with English language;
5. No limitation regarding date of publication;
6. Studies focused on the social media for education and communication of cancer patients;

#### 2-2-3- Exclusion Criteria:

1. Reviews, meta-analysis, dissertation theses, reports, conference abstracts, letter to editor, commentaries or protocols;
2. Papers written in languages other than English;
3. Full-text of papers were not available;

4. The studies with not enough statistical details regarding the effect of social media of education and communication of cancer patients.
5. Papers without relevant outcomes (social media of education and communication of cancer patients);

### 2-3- Information sources

We will conduct a systematic search in electronic databases including PubMed, Web of Science, Scopus, and the Cochrane Library from inception until 23 May 2022. In addition, we will search in Google Scholar to identify gray literature. No restriction related to date of publication will be applied. Reference lists of included articles will also be hand-searched.

### 2-4- Search strategy

We will use a combination of keywords and MeSH terms depending on the database to capture the following concepts: cancer, social media, and education & communication. An example of the search strategy for the PubMed database, composed of #1 AND #2 AND #3 will be used as a search strategy in #4, shown in Table 1.

**Table 1. PubMed database strategy search**

| Number | Search Strategy                                                                                                                                                                                                                                                                                                                                                                                                                                                                                                               |
|--------|-------------------------------------------------------------------------------------------------------------------------------------------------------------------------------------------------------------------------------------------------------------------------------------------------------------------------------------------------------------------------------------------------------------------------------------------------------------------------------------------------------------------------------|
| #1     | ((((((((((("Social Media"[Mesh]) OR ("Social Networking"[Mesh])) OR ("social media*"[Title/Abstract])) OR ("Social network*"[Title/Abstract])) OR ("social medium"[Title/Abstract])) OR ("social network site*"[Title/Abstract])) OR ("social networking site*"[Title/Abstract])) OR ("Online social network*"[Title/Abstract])) OR (Online social site* [Title/Abstract])) OR ("online communit*"[Title/Abstract])) OR ("virtual communit*"[Title/Abstract])) OR ("online forum*"[Title/Abstract])) OR (SNA[Title/Abstract]) |
| #2     | ((((((("Neoplasms"[Mesh]) OR ("cancer*"[Title/Abstract])) OR ("tumour*"[Title/Abstract])) OR ("tumor*"[Title/Abstract])) OR ("neoplasm*"[Title/Abstract])) OR ("neoplas*"[Title/Abstract])) OR ("carcinoma*"[Title/Abstract])) OR ("malignan*"[Title/Abstract])                                                                                                                                                                                                                                                               |
| #3     | "Education"[MeSH Terms] OR "education*"[Title/Abstract] OR "train*"[Title/Abstract] OR "teach*"[Title/Abstract] OR "learn*"[Title/Abstract] OR "Communication"[MeSH Terms] OR "communicat*"[Title/Abstract] OR "electronic communication*"[Title/Abstract]                                                                                                                                                                                                                                                                    |
| #4     | #1 AND #2 AND #3                                                                                                                                                                                                                                                                                                                                                                                                                                                                                                              |

### 2-5- Study selection

The results of the searches will be entered into an EndNote library and duplicates will be removed. Two authors (A.B.Y, S.H.S) independently will assess and screen study eligibility and will be involved in study selection. All titles, abstracts, and full-text articles will be reviewed independently by A.B.Y, and S.H.S according to the inclusion and exclusion criteria. Discrepancies will be resolved by discussion. In case of disagreement among the authors, S.R.N.K will available for arbitration.

### 2-6- Data extraction

We will use a piloted data collection form in Excel (Microsoft, 2019) extract data from included studies. The two reviewers (A.B.Y, and S.H.S) will perform data extraction independently with discrepancies resolved by discussion or a third reviewer (S.R.N.K).

This form will include the following characteristics from each study, when available:

- **General information:** Title, authors, date of publication, country/geographical area, aim of study, study design, journal title, and other details.
- **Participants:** sample size, age, gender, ethnicity, type of cancer and stage.
- **Intervention:** type of intervention (education or communication or both), social media platform, methods of intervention (message, video, image, audio, and etc.), comparison method to intervention, intervention duration, treatment steps (surgery, radiation, chemotherapy, and others).
- **Outcomes:** related measuring indicators for communication and education of cancer patients by social media intervention.

### 2-7- Outcomes

In this study, education and communications outcomes through their related measuring indicators will be considered.

### 2-8- Assessment of Bias

The risk of bias for the articles selected for this review will be assessed with the following quality checking instruments: Cochrane Risk of Bias tool for randomized controlled trials (RCTs) and non-randomized controlled trials (NRCTs), Newcastle-Ottawa Scale (NOS) for Cohort and Case-Control Studies (before-after studies), respectively (28). The risk of bias assessment will be independently completed for each study by two reviewers (A.B.Y, S.H.S). Discrepancies will resolve by discussion or S.R.N.K if needed. The Robvis tool will use to create a risk of bias plot (29).

### 2-9- Data synthesis and analysis

Based on the study's variables, the descriptive analysis including frequency and percentage parameters will be calculated and in the frame of graphs and tables presented. Furthermore, we will report the results of the quality assessment of studies in table format. In the result section, a narrative synthesis will be applied to describe and compare the paper's results, and meta-analysis is not the aimed of this systematic review due to the diversity of outcomes and results.

### 3- Discussion

The proposed systematic review will identify the effect of social media interventions on the education and communication among patients affected by any type of cancer. Several studies have been conducted in the field of education and communication for cancer patients. However, their focus has not been on social media. For example, Howell et al reported on the effect of self-management education interventions for patients with cancer (18). Hong et al reported on identifying the existing digital interventions to improve patient-provider communication among cancer patients (23). Our review will include patients with any type of cancer or malignancy and any stage of disease, and using of all social network platforms for patients' education and communication. To the best of our knowledge, there has not been any systematic review on the effects of social media interventions on the education and communication among patients with cancer. This will be the most comprehensive and up-to-date systematic review as it relates to social media interventions on the education and communication among patients affected by any type of cancer.

The evaluation of this systematic review will be divided into four sections: identification, study inclusion, data extraction and data synthesis. The review will be limited to the English language, which may result in exclusions of potentially relevant studies published in other languages. To minimize any selection bias regarding the studies that get included in the review, we will use two independent reviewers to conduct the screening and a third reviewer to resolve conflicts.

### Acknowledgements

The authors thank all the participants in the study.

### Authors' Contributions

A.B.Y, S.H.S and S.R.N.K conceived the idea for the review. A.B.Y, S.H.S and S.R.N.K were involved in the study selection, quality assessment, and data extraction. H.B, and H.M conducted the statistical analysis. A.B.Y, S.H.S, S.R.N.K, and E.A wrote the first draft of the manuscript and all authors revised it. All authors reviewed the manuscript, contributed to critical changes, and approved the final version of the manuscript for submission.

### Funding

No Funding.

### Declarations

### Ethical approval and consent to participate

Not applicable.

### Patient consent for publication

Not applicable.

**Competing interests**

The authors declare no competing interests.

**Contributor Information**

Alireza Banaye Yazdipour, Email: [byazdipoura@razi.tums.ac.ir](mailto:byazdipoura@razi.tums.ac.ir)

Hassan Sajjadi, Email: [hasan.sajjadi1995@gmail.com](mailto:hasan.sajjadi1995@gmail.com)

For peer review only

## References

1. World Health Organization. Cancer Fact sheet 2022 [Available from: <https://www.who.int/en/news-room/fact-sheets/detail/cancer>].
2. Chota A, George BP, Abrahamse H. Interactions of multidomain pro-apoptotic and anti-apoptotic proteins in cancer cell death. *Oncotarget*. 2021;12(16):1615-26.
3. Dickinson R, Hall S, Sinclair JE, Bond C, Murchie P. Using technology to deliver cancer follow-up: a systematic review. *BMC Cancer*. 2014;14(1):311.
4. Giannakoulis VG, Papoutsis E, Siempos II. Effect of Cancer on Clinical Outcomes of Patients With COVID-19: A Meta-Analysis of Patient Data. 2020(6):799-808.
5. Ebu NI, Amisah-Essel S, Asiedu C, Akaba S, Pereko KA. Impact of health education intervention on knowledge and perception of cervical cancer and screening for women in Ghana. *BMC Public Health*. 2019;19(1):1505.
6. Berry DL, Blonquist TM, Patel RA, Halpenny B, McReynolds J. Exposure to a Patient-Centered, Web-Based Intervention for Managing Cancer Symptom and Quality of Life Issues: Impact on Symptom Distress. *J Med Internet Res*. 2015;17(6):e136.
7. Breen S, Ritchie D, Schofield P, Hsueh Y-s, Gough K, Santamaria N, et al. The Patient Remote Intervention and Symptom Management System (PRISMS) – a Telehealth- mediated intervention enabling real-time monitoring of chemotherapy side-effects in patients with haematological malignancies: study protocol for a randomised controlled trial. *Trials*. 2015;16(1):472.
8. Snyder CF, Wu AW, Miller RS, Jensen RE, Bantug ET, Wolff AC. The role of informatics in promoting patient-centered care. *Cancer J*. 2011;17(4):211-8.
9. Langford A, Loeb S. Perceived Patient-Provider Communication Quality and Sociodemographic Factors Associated With Watching Health-Related Videos on YouTube: A Cross-Sectional Analysis. *J Med Internet Res*. 2019;21(5):e13512.
10. Huo J, Desai R, Hong Y-R, Turner K, Mainous AG, Bian J. Use of Social Media in Health Communication: Findings From the Health Information National Trends Survey 2013, 2014, and 2017. *Cancer Control*. 2019;26(1):1073274819841442.
11. Ahmed YA, Ahmad MN, Ahmad N, Zakaria NH. Social media for knowledge-sharing: A systematic literature review. *Telematics and Informatics*. 2019;37:72-112.
12. Lyson HC, Le GM, Zhang J, Rivadeneira N, Lyles C, Radcliffe K, et al. Social Media as a Tool to Promote Health Awareness: Results from an Online Cervical Cancer Prevention Study. *Journal of Cancer Education*. 2019;34(4):819-22.
13. Welch V, Petkovic J, Pardo Pardo J, Rader T, Tugwell P. Interactive social media interventions to promote health equity: an overview of reviews. *Health Promot Chronic Dis Prev Can*. 2016;36(4):63-75.
14. Xu S, Markson C, Costello KL, Xing CY, Demissie K, Llanos AA. Leveraging Social Media to Promote Public Health Knowledge: Example of Cancer Awareness via Twitter. *JMIR public health and surveillance*. 2016;2(1):e17.
15. Shi J, Chen L, Su Y, Chen M. Offspring Caregivers of Chinese Women with Breast Cancer: Their Social Support Requests and Provision on Social Media. *Telemedicine and e-Health*. 2018;25(8):748-55.
16. Hibbard JH, Mahoney ER, Stock R, Tusler M. Do increases in patient activation result in improved self-management behaviors? *Health services research*. 2007;42(4):1443-63.
17. Han CJ, Lee YJ, Demiris G. Interventions Using Social Media for Cancer Prevention and Management: A Systematic Review. *Cancer nursing*. 2018;41(6):E19-e31.
18. Howell D, Harth T, Brown J, Bennett C, Boyko S. Self-management education interventions for patients with cancer: a systematic review. *Supportive Care in Cancer*. 2017;25(4):1323-55.
19. Saei Ghare Naz M, Kariman N, Ebadi A, Ozgoli G, Ghasemi V, Rashidi Fakari F. Educational Interventions for Cervical Cancer Screening Behavior of Women: A Systematic Review. *Asian Pacific journal of cancer prevention : APJCP*. 2018;19(4):875-84.

- 1  
2  
3 20. Oldenmenger WH, Geerling JI, Mostovaya I, Vissers KCP, de Graeff A, Reyners AKL, et al. A  
4 systematic review of the effectiveness of patient-based educational interventions to improve cancer-related  
5 pain. *Cancer Treatment Reviews*. 2018;63:96-103.
- 6 21. Salonen A, Ryhänen AM, Leino-Kilpi H. Educational benefits of Internet and computer-based  
7 programmes for prostate cancer patients: A systematic review. *Patient Education and Counseling*.  
8 2014;94(1):10-9.
- 9 22. Peterson EB, Ostroff JS, DuHamel KN, D'Agostino TA, Hernandez M, Canzona MR, et al. Impact  
10 of provider-patient communication on cancer screening adherence: A systematic review. *Preventive*  
11 *Medicine*. 2016;93:96-105.
- 12 23. Hong YA, Hossain MM, Chou W-YS. Digital interventions to facilitate patient-provider  
13 communication in cancer care: A systematic review. *Psycho-Oncology*. 2020;29(4):591-603.
- 14 24. Williamson S, Patterson J, Crosby R, Johnson R, Sandhu H, Johnson S, et al. Communication of  
15 cancer screening results by letter, telephone or in person: A mixed methods systematic review of the effect  
16 on attendee anxiety, understanding and preferences. *Preventive Medicine Reports*. 2019;13:189-95.
- 17 25. Agboola SO, Ju W, Elfiky A, Kvedar JC, Jethwani K. The Effect of Technology-Based  
18 Interventions on Pain, Depression, and Quality of Life in Patients With Cancer: A Systematic Review of  
19 Randomized Controlled Trials. *J Med Internet Res*. 2015;17(3):e65.
- 20 26. Hoey LM, Ieropoli SC, White VM, Jefford M. Systematic review of peer-support programs for  
21 people with cancer. *Patient Education and Counseling*. 2008;70(3):315-37.
- 22 27. Shamseer L, Moher D, Clarke M, Ghersi D, Liberati A, Petticrew M, et al. Preferred reporting  
23 items for systematic review and meta-analysis protocols (PRISMA-P) 2015: elaboration and explanation.  
24 *BMJ : British Medical Journal*. 2015;349:g7647.
- 25 28. Hamm MP, Shulhan J, Williams G, Milne A, Scott SD, Hartling L. A systematic review of the use  
26 and effectiveness of social media in child health. *BMC Pediatrics*. 2014;14(1):138.
- 27 29. McGuinness LA, Higgins JPT. Risk-of-bias VISualization (robvis): An R package and Shiny web  
28 app for visualizing risk-of-bias assessments. *Research synthesis methods*. 2021;12(1):55-61.
- 29  
30  
31  
32  
33  
34  
35  
36  
37  
38  
39  
40  
41  
42  
43  
44  
45  
46  
47  
48  
49  
50  
51  
52  
53  
54  
55  
56  
57  
58  
59  
60

# BMJ Open

## The effect of social media interventions on the education and communication among patients with cancer: a systematic review protocol

|                                 |                                                                                                                                                                                                                                                                                                                                                                                                                                                                                                                                                                                                                                              |
|---------------------------------|----------------------------------------------------------------------------------------------------------------------------------------------------------------------------------------------------------------------------------------------------------------------------------------------------------------------------------------------------------------------------------------------------------------------------------------------------------------------------------------------------------------------------------------------------------------------------------------------------------------------------------------------|
| Journal:                        | <i>BMJ Open</i>                                                                                                                                                                                                                                                                                                                                                                                                                                                                                                                                                                                                                              |
| Manuscript ID                   | bmjopen-2022-066550.R1                                                                                                                                                                                                                                                                                                                                                                                                                                                                                                                                                                                                                       |
| Article Type:                   | Protocol                                                                                                                                                                                                                                                                                                                                                                                                                                                                                                                                                                                                                                     |
| Date Submitted by the Author:   | 19-Oct-2022                                                                                                                                                                                                                                                                                                                                                                                                                                                                                                                                                                                                                                  |
| Complete List of Authors:       | Banaye Yazdipour, Alireza; Tehran University of Medical Sciences, Department of Health Information Management<br>Niakan Kalhori, Sharareh R. ; Tehran University of Medical Sciences, Health Information Management<br>Bostan, Hassan; Tehran University of Medical Sciences, Department of Health Information Management<br>Masoorian, hoorie; Tehran University of Medical Sciences, Department of Health Information Management<br>Ataee, Elham; Tehran University of Medical Sciences, Department of Health Information Management<br>Sajjadi, Hasan; Tehran University of Medical Sciences, Department of Health Information Management |
| <b>Primary Subject Heading</b>: | Communication                                                                                                                                                                                                                                                                                                                                                                                                                                                                                                                                                                                                                                |
| Secondary Subject Heading:      | Oncology, Medical education and training                                                                                                                                                                                                                                                                                                                                                                                                                                                                                                                                                                                                     |
| Keywords:                       | Health informatics < BIOTECHNOLOGY & BIOINFORMATICS, Information management < BIOTECHNOLOGY & BIOINFORMATICS, Information technology < BIOTECHNOLOGY & BIOINFORMATICS, EDUCATION & TRAINING (see Medical Education & Training)                                                                                                                                                                                                                                                                                                                                                                                                               |
|                                 |                                                                                                                                                                                                                                                                                                                                                                                                                                                                                                                                                                                                                                              |

SCHOLARONE™  
Manuscripts

## The effect of social media interventions on the education and communication among patients with cancer: a systematic review protocol

Alireza Banaye Yazdipour<sup>1,2</sup>, Sharareh R. Niakan Kalhori<sup>1</sup>, Hassan Bostan<sup>1,3</sup>, Hoorie Masoorian<sup>1</sup>, Elham Ataee<sup>1</sup>, Hasan Sajjadi<sup>1</sup>

1- Department of Health Information Management, School of Allied Medical Sciences, Tehran University of Medical Sciences, Tehran, Iran

2- Students' Scientific Research Center (SSRC), Tehran University of Medical Sciences, Tehran, Iran

3- Abadan University of Medical Sciences, Abadan, Iran

\*Corresponding author: Hasan Sajjadi, hasan.sajjadi1995@gmail.com

### Abstract

**Introduction** Cancer is a leading cause of death worldwide. In addition, it accounted for approximately 10 million deaths in 2020 alone. Information and communication technologies (ICT) have great potential for improving health education and communication. Social media is one of the technologies that can help cancer patients and healthcare providers communicate and provide educational information. Social media are increasingly being used for health promotion and behavior change. This is a protocol of systematic review to identify the effect of social media interventions on the education and communication among patients affected by cancer. This study aims to reveal the steps of conducting research that systematically reviews all studies for the specific objective. This study aims to examine the social media interventions to improve awareness and knowledge about the disease for cancer patients and improve communication among them.

**Methods and analysis** This protocol is reported in accordance with the Preferred Reporting Items for Systematic Review and Meta-Analysis Protocols (PRISMA-P) checklist. We will include experimental design studies that report the effect of social media interventions on education and communication among patients with cancer or malignancy and any stage of the disease. Interventions will be inclusive, using all social network platforms for patients' communication and education. We will search PubMed, Web of Science, Scopus, and the Cochrane Library from inception until 23 May 2022. Two independent reviewers will screen titles, abstracts, and full-text articles with conflicts resolved through discussion or by a third reviewer, as needed. All titles, abstracts, and full-text papers will be reviewed independently by two reviewers according to the inclusion and exclusion criteria. Discrepancies will resolve by discussion or S.R.N.K if needed. The two reviewers will also independently complete risk of bias assessments for each included study. The descriptive analysis, including frequency and percentage parameters, will be calculated based on the study's variables. Furthermore, we will report the results of the quality assessment of studies in table format. In the result section, a narrative synthesis will be applied to describe and compare the paper's results.

**Ethics and dissemination** Ethics approval will not be needed because the data to be used in this systematic review and meta-analysis will be extracted from published studies. It will be disseminated by publication in a peer-reviewed journal.

1  
2  
3 **PROSPERO registration number** CRD42022334691.  
4  
5

6  
7 **Strengths and limitations of this study**

- 8  
9  
10  
11  
12  
13  
14  
15  
16  
17  
18  
19  
20  
21
- To the best of our knowledge, no previous systematic reviews to investigate the effect of social media intervention on education and communication among patients affected by any type of cancer exist.
  - We will conduct a systematic search in valid electronic databases, including PubMed, Web of Science, Scopus, and the Cochrane Library.
  - We will consider patients with any type of cancer or malignancy and any stage of the disease.
  - We will consider all social network platforms for patients' communication and education.
  - This study will be limited to the English language.

22  
23  
24  
25  
26  
27  
28  
29  
30  
31  
32  
33  
34  
35  
36  
37  
38  
39  
40  
41  
42  
43  
44  
45  
46  
47  
48  
49  
50  
51  
52  
53  
54  
55  
56  
57  
58  
59  
60

**1- Introduction**

According to World Health Organization (WHO), cancer is a leading cause of death worldwide. In addition, accounting for approximately 10 million deaths in 2020 alone (1). The most common types of cancer include breast, lung, colorectal, prostate, skin (non-melanoma), and stomach (1, 2). Due to limited resources contributing to cancer, it is essential to raise awareness, knowledge, and understanding of patients about cancer (3-5).

It has been over a decade since the Institute of Medicine (IOM) first recommended that patients should have an active role in their health care (6). Information and communication technologies (ICT) have great potential for improving health education (7). Technology also has redefined the way patients and providers communicate and obtain health information (8). Social media is one of the technologies that can help cancer patients and healthcare providers communicate and provide educational information (9). The number of social media users has increased significantly in the past decade, and social media have many opportunities and benefits for health care (10). Social media are widespread web-based or mobile-based platforms that allow individuals to connect with others within a virtual network where they can create, share or exchange digital content in various formats, such as messages, information, photos, and videos (11). Social media tools and platforms such as Facebook and Twitter can be essential in public health promotion (12, 13). They help patients communicate with each other and healthcare professionals and share health information and experiences about disease prevention, symptoms, and treatment (10, 12, 14). In addition, they provide emotional and social support for cancer patients and their healthcare providers (15). A collaborative and interactive relationship between patients together and patients with healthcare professionals is considered an essential element for patient empowerment and illness management (16). Due to the ability to share educational content, social media may improve knowledge or awareness of health topics or motivate cancer patients' behavior change (12). Social media can facilitate the process of education and communication with patients affected by cancer and health care providers. In addition, its leads to saving time and cost (17).

Although systematic reviews were conducted for education (18-21) and communication (22-26) with cancer patients, no systematic review is available to investigate the effect of social media intervention on these specific outcomes. This is the first protocol for a systematic review to identify the impact of social media interventions on education and communication among patients affected by any cancer.

## 2- Methods and analysis

### 2-1- Study design

This systematic review protocol was written and reported according to the Preferred Reporting Items for Systematic Review and Meta-Analysis Protocols (PRISMA-P) checklist (27).

### 2-2 Eligibility criteria

#### 2-2-1- PICO framework

We will use the population, intervention, comparators, and outcomes (PICO) framework for this systematic review to clearly define this review's different components and aid in study selection.

#### Population:

- Patients with any type of cancer or malignancy and any stage of the disease.

#### Intervention:

- Using all social network platforms for patients' communication and education.

#### Comparison:

- Patients receive the same sort of intervention with social media and other ways of education and communication.
- Some studies will have no comparison or comparator intervention.

#### Outcome:

- Education-related outcomes, including awareness and knowledge improvement.
- Communications-related outcomes, such as communication with family members, healthcare providers, same cancer-affected patients, and other stakeholders.

#### 2-2-2- Further inclusion criteria:

1. Original research papers and proceeding papers;
2. Full text available;
3. Any experimental study (randomized controlled trial or quasi-experimental with pre/post design);
4. Studies with English language;
5. No limitation regarding date of publication;
6. Studies focused on the social media for education and communication of cancer patients;

#### 2-2-3- Exclusion Criteria:

1. Reviews, meta-analysis, dissertation theses, reports, conference abstracts, letter to editor, commentaries or protocols;
2. Papers written in languages other than English;
3. Full-text of papers were not available;
4. The studies with not enough statistical details regarding the effect of social media of education and communication of cancer patients.

5. Papers without relevant outcomes (social media of education and communication of cancer patients);

### 2-3- Information sources

We will conduct a systematic search in electronic databases, including PubMed, Web of Science, Scopus, and the Cochrane Library, from inception until 23 May 2022. No restriction related to the date of publication will be applied. Reference lists of included articles will also be hand-searched.

### 2-4- Search strategy

We will use a combination of keywords and MeSH terms depending on the database to capture the following concepts: cancer, social media, and education & communication. An example of the search strategy for the PubMed database, composed of #1 AND #2 AND #3, will be used as a search strategy in #4, shown in Table 1.

**Table 1. PubMed database strategy search**

| Number | Search Strategy                                                                                                                                                                                                                                                                                                                                                                                                                                                                                                    |
|--------|--------------------------------------------------------------------------------------------------------------------------------------------------------------------------------------------------------------------------------------------------------------------------------------------------------------------------------------------------------------------------------------------------------------------------------------------------------------------------------------------------------------------|
| #1     | ((((((((((("Social Media"[Mesh]) OR ("Social Networking"[Mesh]) OR ("social media*"[Title/Abstract]) OR ("Social network*"[Title/Abstract]) OR ("social medium"[Title/Abstract]) OR ("social network site*"[Title/Abstract]) OR ("social networking site*"[Title/Abstract]) OR ("Online social network*"[Title/Abstract]) OR (Online social site* [Title/Abstract]) OR ("online communit*"[Title/Abstract]) OR ("virtual communit*"[Title/Abstract]) OR ("online forum*"[Title/Abstract]) OR (SNA[Title/Abstract]) |
| #2     | ((((((("Neoplasms"[Mesh]) OR ("cancer*"[Title/Abstract]) OR ("tumour*"[Title/Abstract]) OR ("tumor*"[Title/Abstract]) OR ("neoplas*"[Title/Abstract]) OR ("carcinoma*"[Title/Abstract]) OR ("malignan*"[Title/Abstract])                                                                                                                                                                                                                                                                                           |
| #3     | "Education"[MeSH Terms] OR "education*"[Title/Abstract] OR "train*"[Title/Abstract] OR "teach*"[Title/Abstract] OR "learn*"[Title/Abstract] OR "Communication"[MeSH Terms] OR "communicat*"[Title/Abstract] OR "electronic communication*"[Title/Abstract]                                                                                                                                                                                                                                                         |
| #4     | #1 AND #2 AND #3                                                                                                                                                                                                                                                                                                                                                                                                                                                                                                   |

### 2-5- Study selection

The results of the searches will be entered into an EndNote library, and duplicates will be removed. Two authors (A.B.Y, H.S) will independently assess and screen study eligibility and be involved in study selection. All titles, abstracts, and full-text articles will be reviewed independently by A.B.Y and H.S according to the inclusion and exclusion criteria. Discrepancies will be resolved by discussion. In case of disagreement among the authors, S.R.N.K will be available for arbitration.

### 2-6- Data extraction

We will use a piloted data collection form in Excel (Microsoft, 2019) to extract data from included studies. The two reviewers (A.B.Y and H.S) will perform data extraction independently, with discrepancies resolved by discussion or a third reviewer (S.R.N.K).

This form will include the following characteristics from each study, when available:

- **General information:** Title, authors, date of publication, journal title, country/geographical area, aim of study, and study design.
- **Participants:** sample size, age, gender, ethnicity, type of cancer and stage.
- **Intervention:** type of intervention (education or communication or both), social media platform, methods of intervention (message, video, image, audio, and etc.), comparison method to intervention, intervention duration, treatment steps (surgery, radiation, chemotherapy).
- **Outcomes:** related measuring indicators for communication and education of cancer patients by social media intervention.

### ***2-7- Outcomes***

In this study, education and communications outcomes through their related measuring indicators will be considered.

### ***2-8- Assessment of Bias***

The risk of bias for the articles selected for this review will be evaluated by two independent appraisers (A.B.Y and H.S) using the Joanna Briggs Institute (JBI) critical appraisal checklists for randomized controlled trials (RCTs) and quasi-experimental studies (28). The JBI critical appraisal checklist for RCTs includes 13 items to assess randomization, allocation concealment, baseline outcomes, blinding (participants/deliverers/assessors), follow-up and drop-out, indicators, reliability of assessment tools, study design, and statistical methods. The 9-item JBI critical appraisal checklist for quasi-experimental studies includes selection bias, information on the control group, outcome assessment, and statistical analysis. Each item will be evaluated using four responses: yes, no, unclear, and not applicable. More 'yes' responses on the appraisal items will be indicated a superior quality study. The criteria will be used to rank the risk of bias, including i)  $\leq 49\%$  = high risk of bias; ii) 50% to 69% = Moderate risk of bias; iii) above 70% = low risk of bias. In case of disagreement, the two reviewers consulted a third reviewer (S.R.N.K) to reach a consensus.

### ***2-9- Data synthesis and analysis***

Based on the study's variables, the descriptive analysis, including frequency and percentage parameters, will be calculated and presented in the frame of graphs and tables. Furthermore, we will report the results of the quality assessment of studies in table format. In the result section, a narrative synthesis will be applied to describe and compare the paper's results. Meta-analysis is not the aim of this systematic review due to the diversity of outcomes and results.

### ***2-10- Patient and Public Involvement***

Patients and/or the public were not involved in the design, or conduct, or reporting, or dissemination plans of this research.

### ***2-11- Ethics and dissemination***

Ethics approval will not be needed because the data to be used in this systematic review and meta-analysis will be extracted from published studies. It will be disseminated by publication in a peer-reviewed journal.

### **3- Discussion**

The proposed systematic review will identify the effect of social media interventions on education and communication among patients affected by any cancer. Several studies have been conducted in the field of education and communication for cancer patients. However, their focus has not been on social media. For example, Howell et al. reported on the effect of self-management education interventions for patients with cancer (18). Hong et al. reported identifying the existing digital interventions to improve patient-provider communication among cancer patients (23). Our review will include patients with any cancer or malignancy and any stage of disease and the use of all social network platforms for patients' education and communication. To the best of our knowledge, there has not been any systematic review of the effects of social media interventions on education and communication among patients with cancer. This will be the most comprehensive and up-to-date systematic review as it relates to social media interventions on the education and communication among patients affected by any cancer.

The evaluation of this systematic review will be divided into four sections: identification, study inclusion, data extraction, and data synthesis. The review will be limited to the English language, which may result in exclusions of potentially relevant studies published in other languages. To minimize selection bias regarding the studies included in the review, we will use two independent reviewers to conduct the screening and a third reviewer to resolve conflicts.

## References

1. World Health Organization. Cancer Fact sheet 2022 [Available from: <https://www.who.int/en/news-room/fact-sheets/detail/cancer>].
2. Chota A, George BP, Abrahamse H. Interactions of multidomain pro-apoptotic and anti-apoptotic proteins in cancer cell death. *Oncotarget*. 2021;12(16):1615-26.
3. Dickinson R, Hall S, Sinclair JE, Bond C, Murchie P. Using technology to deliver cancer follow-up: a systematic review. *BMC Cancer*. 2014;14(1):311.
4. Giannakoulis VG, Papoutsis E, Siempos II. Effect of Cancer on Clinical Outcomes of Patients With COVID-19: A Meta-Analysis of Patient Data. 2020(6):799-808.
5. Ebu NI, Amisah-Essel S, Asiedu C, Akaba S, Pereko KA. Impact of health education intervention on knowledge and perception of cervical cancer and screening for women in Ghana. *BMC Public Health*. 2019;19(1):1505.
6. Berry DL, Blonquist TM, Patel RA, Halpenny B, McReynolds J. Exposure to a Patient-Centered, Web-Based Intervention for Managing Cancer Symptom and Quality of Life Issues: Impact on Symptom Distress. *J Med Internet Res*. 2015;17(6):e136.
7. Breen S, Ritchie D, Schofield P, Hsueh Y-s, Gough K, Santamaria N, et al. The Patient Remote Intervention and Symptom Management System (PRISMS) – a Telehealth- mediated intervention enabling real-time monitoring of chemotherapy side-effects in patients with haematological malignancies: study protocol for a randomised controlled trial. *Trials*. 2015;16(1):472.
8. Snyder CF, Wu AW, Miller RS, Jensen RE, Bantug ET, Wolff AC. The role of informatics in promoting patient-centered care. *Cancer J*. 2011;17(4):211-8.
9. Langford A, Loeb S. Perceived Patient-Provider Communication Quality and Sociodemographic Factors Associated With Watching Health-Related Videos on YouTube: A Cross-Sectional Analysis. *J Med Internet Res*. 2019;21(5):e13512.
10. Huo J, Desai R, Hong Y-R, Turner K, Mainous AG, Bian J. Use of Social Media in Health Communication: Findings From the Health Information National Trends Survey 2013, 2014, and 2017. *Cancer Control*. 2019;26(1):1073274819841442.
11. Ahmed YA, Ahmad MN, Ahmad N, Zakaria NH. Social media for knowledge-sharing: A systematic literature review. *Telematics and Informatics*. 2019;37:72-112.
12. Lyson HC, Le GM, Zhang J, Rivadeneira N, Lyles C, Radcliffe K, et al. Social Media as a Tool to Promote Health Awareness: Results from an Online Cervical Cancer Prevention Study. *Journal of Cancer Education*. 2019;34(4):819-22.
13. Welch V, Petkovic J, Pardo Pardo J, Rader T, Tugwell P. Interactive social media interventions to promote health equity: an overview of reviews. *Health Promot Chronic Dis Prev Can*. 2016;36(4):63-75.
14. Xu S, Markson C, Costello KL, Xing CY, Demissie K, Llanos AA. Leveraging Social Media to Promote Public Health Knowledge: Example of Cancer Awareness via Twitter. *JMIR public health and surveillance*. 2016;2(1):e17.
15. Shi J, Chen L, Su Y, Chen M. Offspring Caregivers of Chinese Women with Breast Cancer: Their Social Support Requests and Provision on Social Media. *Telemedicine and e-Health*. 2018;25(8):748-55.
16. Hibbard JH, Mahoney ER, Stock R, Tusler M. Do increases in patient activation result in improved self-management behaviors? *Health services research*. 2007;42(4):1443-63.
17. Han CJ, Lee YJ, Demiris G. Interventions Using Social Media for Cancer Prevention and Management: A Systematic Review. *Cancer nursing*. 2018;41(6):E19-e31.
18. Howell D, Harth T, Brown J, Bennett C, Boyko S. Self-management education interventions for patients with cancer: a systematic review. *Supportive Care in Cancer*. 2017;25(4):1323-55.
19. Saei Ghare Naz M, Kariman N, Ebadi A, Ozgoli G, Ghasemi V, Rashidi Fakari F. Educational Interventions for Cervical Cancer Screening Behavior of Women: A Systematic Review. *Asian Pacific journal of cancer prevention : APJCP*. 2018;19(4):875-84.

- 1  
2  
3 20. Oldenmenger WH, Geerling JI, Mostovaya I, Vissers KCP, de Graeff A, Reyners AKL, et al. A  
4 systematic review of the effectiveness of patient-based educational interventions to improve cancer-related  
5 pain. *Cancer Treatment Reviews*. 2018;63:96-103.
- 6 21. Salonen A, Ryhänen AM, Leino-Kilpi H. Educational benefits of Internet and computer-based  
7 programmes for prostate cancer patients: A systematic review. *Patient Education and Counseling*.  
8 2014;94(1):10-9.
- 9 22. Peterson EB, Ostroff JS, DuHamel KN, D'Agostino TA, Hernandez M, Canzona MR, et al. Impact  
10 of provider-patient communication on cancer screening adherence: A systematic review. *Preventive  
11 Medicine*. 2016;93:96-105.
- 12 23. Hong YA, Hossain MM, Chou W-YS. Digital interventions to facilitate patient-provider  
13 communication in cancer care: A systematic review. *Psycho-Oncology*. 2020;29(4):591-603.
- 14 24. Williamson S, Patterson J, Crosby R, Johnson R, Sandhu H, Johnson S, et al. Communication of  
15 cancer screening results by letter, telephone or in person: A mixed methods systematic review of the effect  
16 on attendee anxiety, understanding and preferences. *Preventive Medicine Reports*. 2019;13:189-95.
- 17 25. Agboola SO, Ju W, Elfiky A, Kvedar JC, Jethwani K. The Effect of Technology-Based  
18 Interventions on Pain, Depression, and Quality of Life in Patients With Cancer: A Systematic Review of  
19 Randomized Controlled Trials. *J Med Internet Res*. 2015;17(3):e65.
- 20 26. Hoey LM, Ieropoli SC, White VM, Jefford M. Systematic review of peer-support programs for  
21 people with cancer. *Patient Education and Counseling*. 2008;70(3):315-37.
- 22 27. Shamseer L, Moher D, Clarke M, Ghersi D, Liberati A, Petticrew M, et al. Preferred reporting  
23 items for systematic review and meta-analysis protocols (PRISMA-P) 2015: elaboration and explanation.  
24 *BMJ : British Medical Journal*. 2015;349:g7647.
- 25 28. Tufanaru C, Munn Z, Aromataris E, Campbell J, Hopp L. Chapter 3: Systematic reviews of  
26 effectiveness. In: Aromataris E, Munn Z (Editors). *JBIC Manual for Evidence Synthesis*. JBI, 2020.  
27 Available from: <https://synthesismanual.jbi.global> (accessed on 21 October 2022).
- 28  
29  
30  
31

### 32 **Authors' Contributions**

33 A.B.Y, S.R.N.K and H.S conceived the idea for the review. A.B.Y, S.R.N.K and H.S wrote the protocol.  
34 H.B, H.M and E.A critically appraised the protocol and contributed to its development by revising different  
35 versions. All authors read and approved the final version of the manuscript for submission.

### 36 **Funding**

37 This research received no specific grant from any funding agency in the public, commercial or not-for-  
38 profit sectors.

### 39 **Competing interests**

40 The authors declare no competing interests.

### 41 **Patient and Public Involvement**

42 Patients and/or the public were not involved in the design, or conduct, or reporting, or dissemination plans  
43 of this research.

### 44 **Patient consent for publication**

45 Not required.

### 46 **Provenance and peer review**

1  
2  
3  
4  
5  
6  
7  
8  
9  
10  
11  
12  
13  
14  
15  
16  
17  
18  
19  
20  
21  
22  
23  
24  
25  
26  
27  
28  
29  
30  
31  
32  
33  
34  
35  
36  
37  
38  
39  
40  
41  
42  
43  
44  
45  
46  
47  
48  
49  
50  
51  
52  
53  
54  
55  
56  
57  
58  
59  
60

Not commissioned; externally peer reviewed.

**ORCID ID**

Alireza Banaye Yazdipour: 0000-0001-9284-2640

**Contributor Information**

Alireza Banaye Yazdipour, Email: byazdipoura@razi.tums.ac.ir

Hasan Sajjadi, Email: hasan.sajjadi1995@gmail.com

For peer review only
