# Supplementary material for: Effect of social media interventions on the education and communication among patients with cancer: a systematic review protocol
Source: PubMed Central journal article supplement — BMJ Open. 2022 Nov 30;12(11):e066550. doi: 10.1136/bmjopen-2022-066550 (PMC9716998; doi:10.1136/bmjopen-2022-066550), 2022-11-30
Supplement: bmjopen-2022-066550.reviewer_comments.pdf [file bmjopen-2022-066550.reviewer_comments.pdf]

## PEER REVIEW HISTORY

BMJ Open publishes all reviews undertaken for accepted manuscripts. Reviewers are asked to complete a checklist review form (<http://bmjopen.bmj.com/site/about/resources/checklist.pdf>) and are provided with free text boxes to elaborate on their assessment. These free text comments are reproduced below.

### ARTICLE DETAILS

|                            |                                                                                                                                      |
|----------------------------|--------------------------------------------------------------------------------------------------------------------------------------|
| <b>TITLE (PROVISIONAL)</b> | The effect of social media interventions on the education and communication among patients with cancer: a systematic review protocol |
| <b>AUTHORS</b>             | Banaye Yazdipour, Alireza; Niakan Kalhori, Sharareh R.; Bostan, Hassan; Masoorian, hoorie; Atae, Elham; Sajjadi, Hasan               |

### VERSION 1 – REVIEW

|                        |                                                            |
|------------------------|------------------------------------------------------------|
| <b>REVIEWER</b>        | Jalilpiran, Yahya<br>Tehran University of Medical Sciences |
| <b>REVIEW RETURNED</b> | 04-Oct-2022                                                |

|                         |                                                                                                                                                                                                                                                                                                                                                                                                                                                                                                                                                                                                                                                                                                                                                                                                                                                                                                                                                                                                                                                                                                                                                                                                                                                                                                                                                                                                                                                                                                                                                                               |
|-------------------------|-------------------------------------------------------------------------------------------------------------------------------------------------------------------------------------------------------------------------------------------------------------------------------------------------------------------------------------------------------------------------------------------------------------------------------------------------------------------------------------------------------------------------------------------------------------------------------------------------------------------------------------------------------------------------------------------------------------------------------------------------------------------------------------------------------------------------------------------------------------------------------------------------------------------------------------------------------------------------------------------------------------------------------------------------------------------------------------------------------------------------------------------------------------------------------------------------------------------------------------------------------------------------------------------------------------------------------------------------------------------------------------------------------------------------------------------------------------------------------------------------------------------------------------------------------------------------------|
| <b>GENERAL COMMENTS</b> | <p>The study of Banaye Yazdipour et al. investigates “The effect of social media interventions on the education and communication among patients with cancer”. I appreciate the study and have some suggestions:</p> <ol style="list-style-type: none"><li>1. A part of the title needs to rewrite: “A study protocol of a systematic review” to “a systematic review study protocol” or “a protocol for a systematic review”</li><li>2. The study will investigate the “effects of social media ....”. So, it should not include “observational studies” or some “experimental studies” which conducted on animals or cells. The authors should clearly specify the types of studies.</li><li>3. Which social media will you take into account? (Table 1). I think specific keywords may need to be included in the search strategy.</li><li>4. By searching the term “neoplas*” you reach the term “neoplasm*” ????. I think “neoplasm” isn’t necessary.</li><li>5. Based on the study's variables, the descriptive analysis including frequency and percentage parameters will be calculated (page 2, lines 46-47) ----- this is a systematic review. What is your reason for calculating frequency and percentage of parameters? Do you aim to do a meta-analysis??</li><li>6. If observational studies will not include. Please remove relevant sentences in the “assessment of risk of bias” section.</li><li>7. Did your study protocol register on any registry websites (PROSPERO, OSF) ????. if yes, please cite it in the text and report its ID number.</li></ol> |
|-------------------------|-------------------------------------------------------------------------------------------------------------------------------------------------------------------------------------------------------------------------------------------------------------------------------------------------------------------------------------------------------------------------------------------------------------------------------------------------------------------------------------------------------------------------------------------------------------------------------------------------------------------------------------------------------------------------------------------------------------------------------------------------------------------------------------------------------------------------------------------------------------------------------------------------------------------------------------------------------------------------------------------------------------------------------------------------------------------------------------------------------------------------------------------------------------------------------------------------------------------------------------------------------------------------------------------------------------------------------------------------------------------------------------------------------------------------------------------------------------------------------------------------------------------------------------------------------------------------------|

|                        |                                                          |
|------------------------|----------------------------------------------------------|
| <b>REVIEWER</b>        | saeedi, soheila<br>Tehran University of Medical Sciences |
| <b>REVIEW RETURNED</b> | 07-Oct-2022                                              |

|                         |                                                                                                                                                                                                                                                                                    |
|-------------------------|------------------------------------------------------------------------------------------------------------------------------------------------------------------------------------------------------------------------------------------------------------------------------------|
| <b>GENERAL COMMENTS</b> | <p>1. it would be interesting if the article underwent some corrections in English since the article has some grammatical errors; for example “Their studies objective is to examine the social media interventions on improving awareness and knowledge about the disease for</p> |
|-------------------------|------------------------------------------------------------------------------------------------------------------------------------------------------------------------------------------------------------------------------------------------------------------------------------|

|  |                                                                                                                                                                                                                                                                                                                                                                                                                                                                                                                                                                                                                                    |
|--|------------------------------------------------------------------------------------------------------------------------------------------------------------------------------------------------------------------------------------------------------------------------------------------------------------------------------------------------------------------------------------------------------------------------------------------------------------------------------------------------------------------------------------------------------------------------------------------------------------------------------------|
|  | <p>patients with cancer and better communications among them” why do you mention “Their studies”.</p> <p>2. The authors mentioned in the "Information sources" section, "In addition, we will search in Google Scholar to identify gray literature," while gray literature is one of your exclusion criteria.</p> <p>3. One of your inclusion criteria is "Studies with observational or experimental design". In order to investigate the effectiveness of the mentioned technology, it is better to include observational studies with a control group.</p> <p>4. void using 'other details' in the data extraction section.</p> |
|--|------------------------------------------------------------------------------------------------------------------------------------------------------------------------------------------------------------------------------------------------------------------------------------------------------------------------------------------------------------------------------------------------------------------------------------------------------------------------------------------------------------------------------------------------------------------------------------------------------------------------------------|

### VERSION 1 – AUTHOR RESPONSE

| Reviewer #1                                                                                                                                                                                                                                                                                                                                                                                    |                                                                                                                                                                                                                                                                                                                                                                                                           |
|------------------------------------------------------------------------------------------------------------------------------------------------------------------------------------------------------------------------------------------------------------------------------------------------------------------------------------------------------------------------------------------------|-----------------------------------------------------------------------------------------------------------------------------------------------------------------------------------------------------------------------------------------------------------------------------------------------------------------------------------------------------------------------------------------------------------|
| Reviewer Comments:                                                                                                                                                                                                                                                                                                                                                                             | Author Response:                                                                                                                                                                                                                                                                                                                                                                                          |
| <p>The study of Banaye Yazdipour et al. investigates “The effect of social media interventions on the education and communication among patients with cancer”. I appreciate the study and have some suggestions:</p> <p>1. A part of the title needs to rewrite: “A study protocol of a systematic review” to “a systematic review study protocol” or “a protocol for a systematic review”</p> | <p>We appreciate the positive feedback from the reviewer.</p> <p>The correction has been made in the title section.</p> <p>According to similar papers published in this journal, it is written as follows:<br/> <i>“The effect of social media interventions on the education and communication among patients with cancer: a systematic review protocol”</i></p>                                        |
| <p>2. The study will investigate the “effects of social media ....”. So, it should not include “observational studies” or some “experimental studies” which conducted on animals or cells. The authors should clearly specify the types of studies.</p>                                                                                                                                        | <p>We appreciate the positive feedback from the reviewer.</p> <p>The correction has been made in the methods and analysis.<br/> <i>“3. Any experimental study (randomized controlled trial or quasi-experimental with pre/post design)”</i></p>                                                                                                                                                           |
| <p>3. Which social media will you take into account? (Table 1). I think specific keywords may need to be included in the search strategy.</p>                                                                                                                                                                                                                                                  | <p>We appreciate the positive feedback from the reviewer.</p> <p>We will consider all social media platforms and not limit them to a specific type.</p>                                                                                                                                                                                                                                                   |
| <p>4. By searching the term “neoplas*” you reach the term “neoplasm*” ??????. I think “neoplasm” isn’t necessary.</p>                                                                                                                                                                                                                                                                          | <p>We appreciate the positive feedback from the reviewer.</p> <p>The word of “neoplasm*” removed from search strategy.</p>                                                                                                                                                                                                                                                                                |
| <p>5. Based on the study's variables, the descriptive analysis including frequency and percentage parameters will be calculated (page 2, lines 46-47) ----- this is a systematic review. What is your reason for calculating frequency and percentage of parameters? Do you aim to do a meta-analysis??</p>                                                                                    | <p>We appreciate the positive feedback from the reviewer. This descriptive analysis, including frequency and percentage parameters, will be used for the interpretation of final findings but not for meta-analysis.</p>                                                                                                                                                                                  |
| <p>6. If observational studies will not include. Please remove relevant sentences in the “assessment of risk of bias” section.</p>                                                                                                                                                                                                                                                             | <p>We appreciate the positive feedback from the reviewer. The correction has been made in the methods.<br/> <i>“The Cochrane Risk of Bias tool will be used to assess the quality of randomized controlled trials included in the review. For quasi-experimental studies using a pre/post design, we will use the Cochrane Effective Practice and Organization of Care framework to assess bias”.</i></p> |
| <p>7. Did your study protocol register on any registry websites (PROSPERO, OSF) ????. if</p>                                                                                                                                                                                                                                                                                                   | <p>We appreciate the positive feedback from the reviewer.</p>                                                                                                                                                                                                                                                                                                                                             |

| yes, please cite it in the text and report its ID number.                                                                                                                                                                                                                                                                                                                  | PROSPERO registration number has been made at the end of the abstract.                                                                                                                                                                          |
|----------------------------------------------------------------------------------------------------------------------------------------------------------------------------------------------------------------------------------------------------------------------------------------------------------------------------------------------------------------------------|-------------------------------------------------------------------------------------------------------------------------------------------------------------------------------------------------------------------------------------------------|
| <b>Reviewer #2</b>                                                                                                                                                                                                                                                                                                                                                         |                                                                                                                                                                                                                                                 |
| Reviewer Comments:                                                                                                                                                                                                                                                                                                                                                         | Author Response:                                                                                                                                                                                                                                |
| 1. it would be interesting if the article underwent some corrections in English since the article has some grammatical errors; for example "Their studies objective is to examine the social media interventions on improving awareness and knowledge about the disease for patients with cancer and better communications among them" why do you mention "Their studies". | We appreciate the positive feedback from the reviewer.<br>Grammatical corrections were made throughout the paper.                                                                                                                               |
| 2. The authors mentioned in the "Information sources" section, "In addition, we will search in Google Scholar to identify gray literature," while gray literature is one of your exclusion criteria.                                                                                                                                                                       | We appreciate the positive feedback from the reviewer. The correction has been made in the method and the sentence related to " <i>In addition, we will search in Google Scholar to identify gray literature</i> " was removed from the method. |
| 3. One of your inclusion criteria is "Studies with observational or experimental design". In order to investigate the effectiveness of the mentioned technology, it is better to include observational studies with a control group.                                                                                                                                       | We appreciate the positive feedback from the reviewer.<br>The correction has been made in the method.<br><br><i>"Any experimental study (randomized controlled trial or quasi-experimental with pre/post design)."</i>                          |
| 4. void using 'other details' in the data extraction section.                                                                                                                                                                                                                                                                                                              | We appreciate the positive feedback from the reviewer.<br>The correction has been made in the method                                                                                                                                            |

### VERSION 2 – REVIEW

|                         |                                                                                  |
|-------------------------|----------------------------------------------------------------------------------|
| <b>REVIEWER</b>         | Jalilpiran, Yahya<br>Tehran University of Medical Sciences                       |
| <b>REVIEW RETURNED</b>  | 20-Oct-2022                                                                      |
| <b>GENERAL COMMENTS</b> | The authors responded to all comments. I don't have further comments.<br>Thanks. |
